# Supplementary material for: Autophagy regulator BECN1 suppresses mammary tumorigenesis driven by WNT1 activation and following parity
Source: PubMed Central journal article supplement — Autophagy. 2014 Oct 30;10(11):2036–52. doi: 10.4161/auto.34398 (PMC4502817; doi:10.4161/auto.34398), 2014-10-30
Supplement: kaup-10-11-973786-s001.pdf [file kaup-10-11-973786-s001.pdf]

## **Supplemental Material to:**

**Michelle Cicchini, Rumela Chakrabarti, Sameera Kongara,  
Sandy Price, Ritu Nahar, Fred Lozy, Hua Zhong,  
Alexei Vazquez, Yibin Kang, and Vassiliki Karantza**

**Autophagy regulator BECN1 suppresses mammary  
tumorigenesis driven by WNT1 activation  
and following parity**

**Autophagy 2014; 10(11)**

**<http://dx.doi.org/10.4161/auto.34398>**

**[www.landesbioscience.com/journals/autophagy/article/34398](http://www.landesbioscience.com/journals/autophagy/article/34398)**

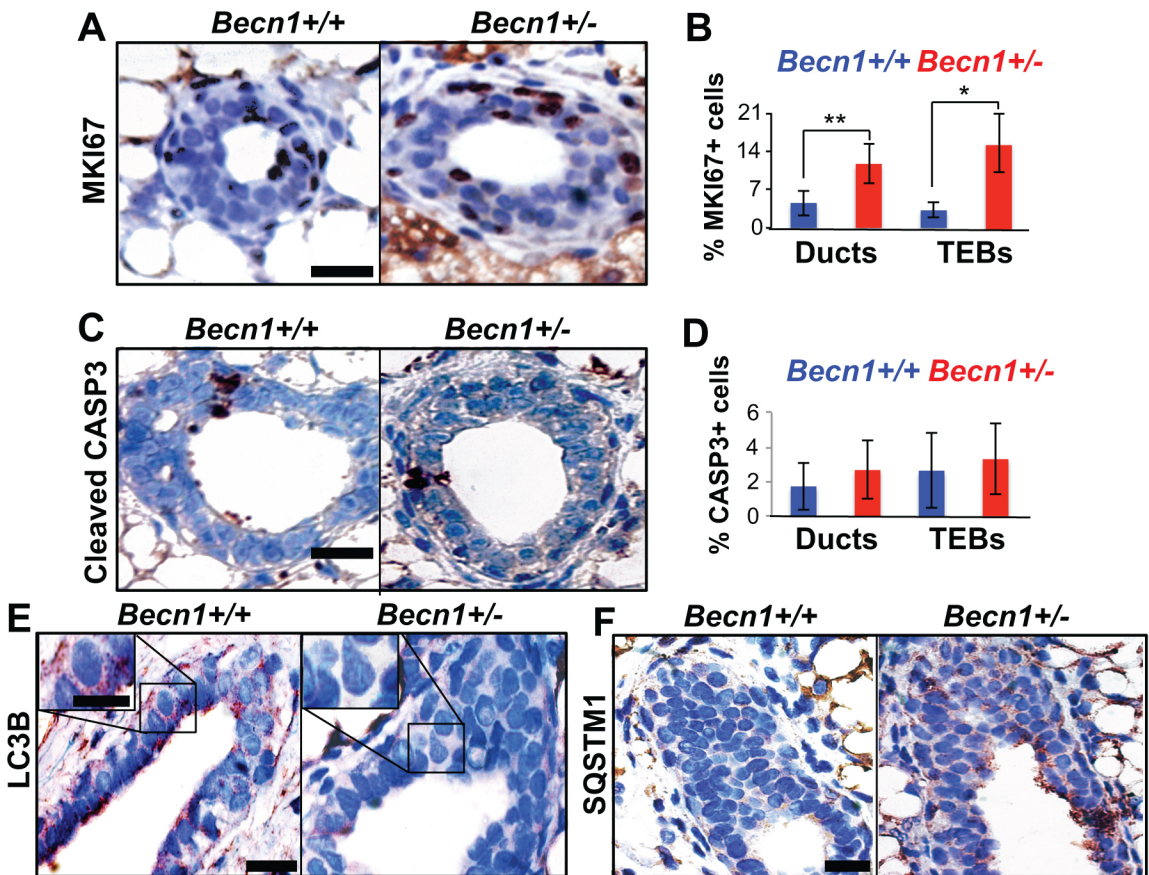

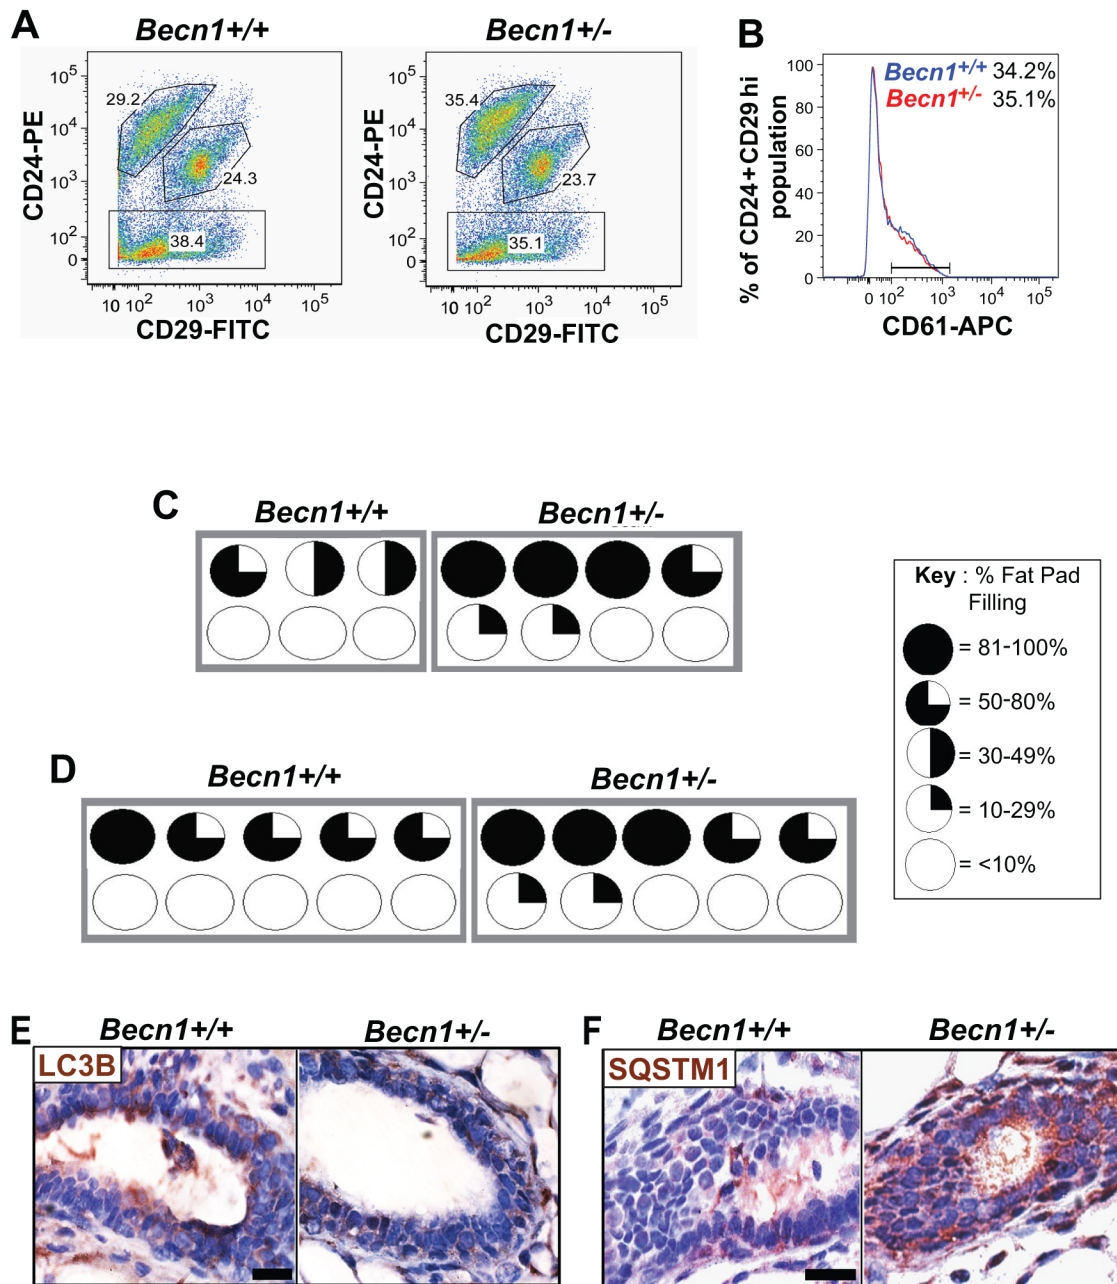

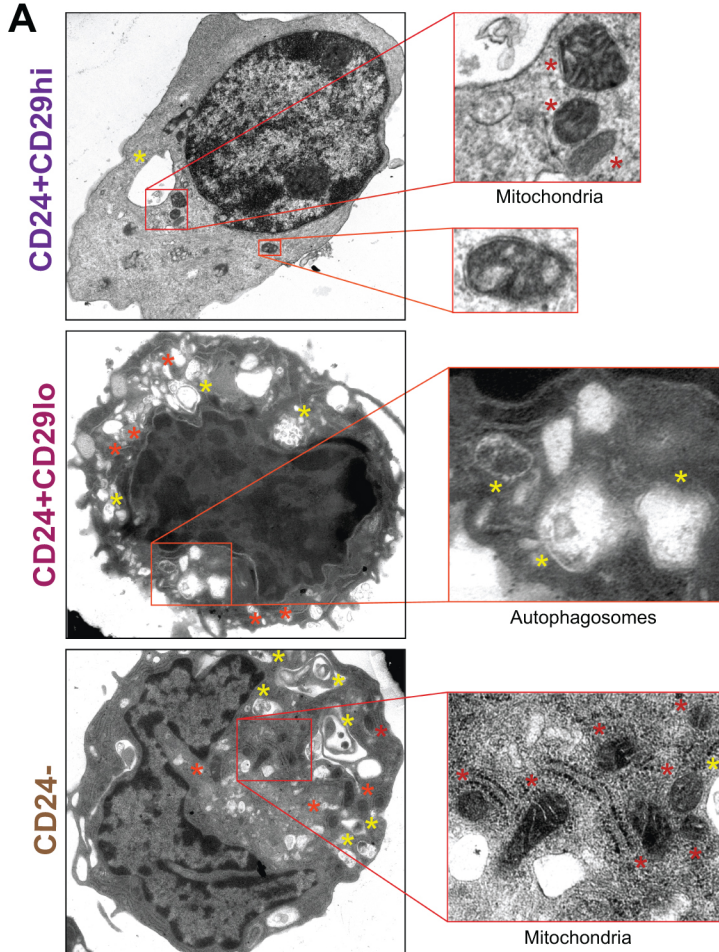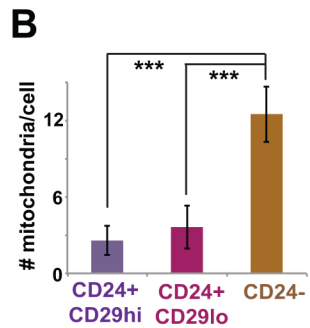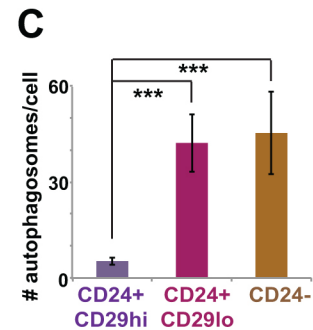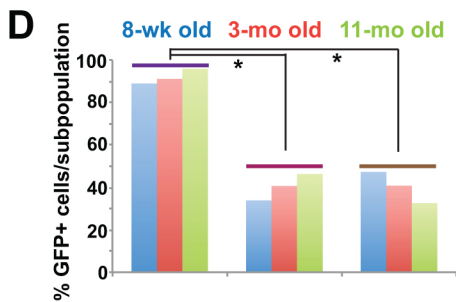

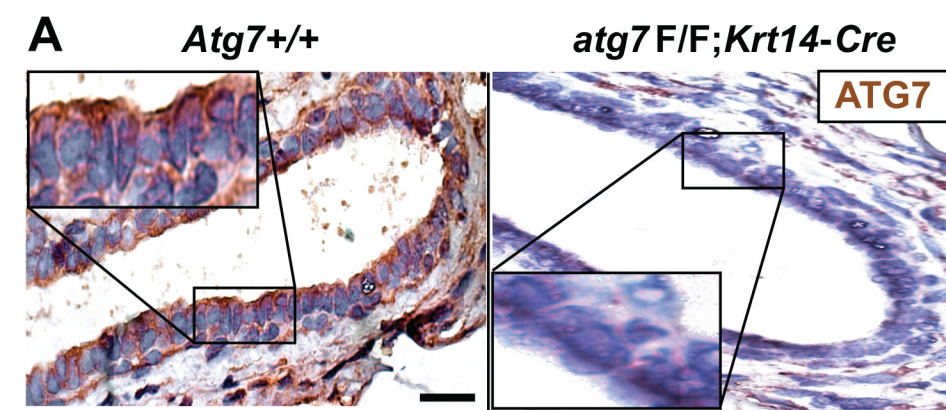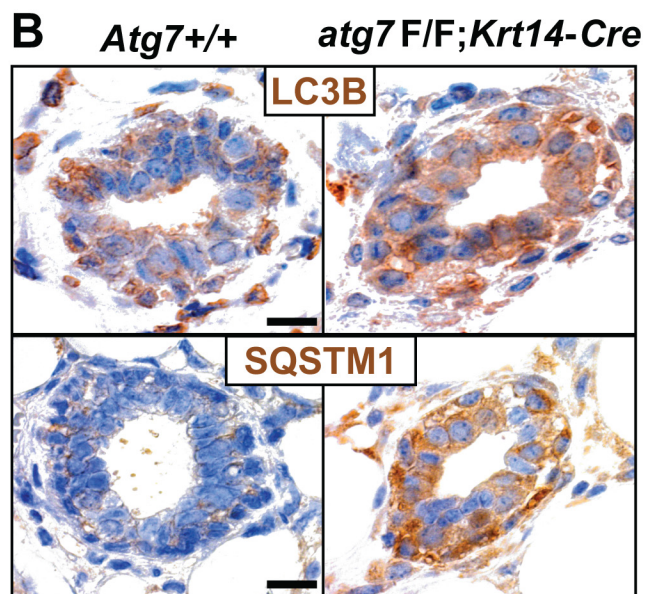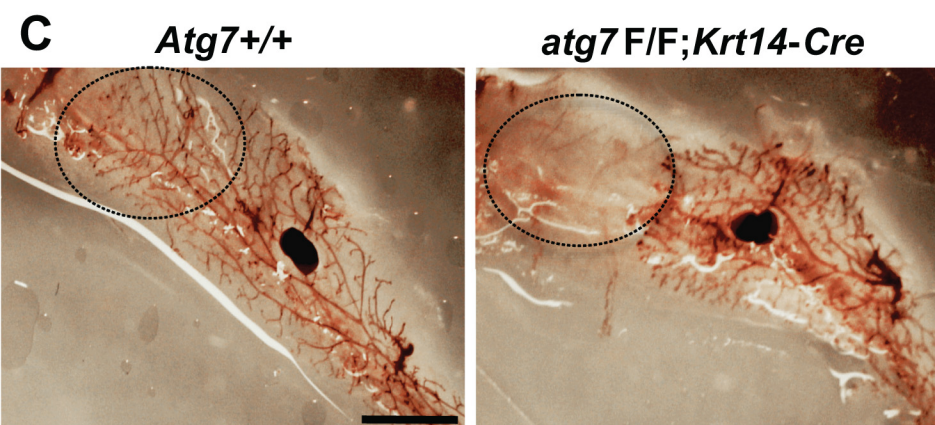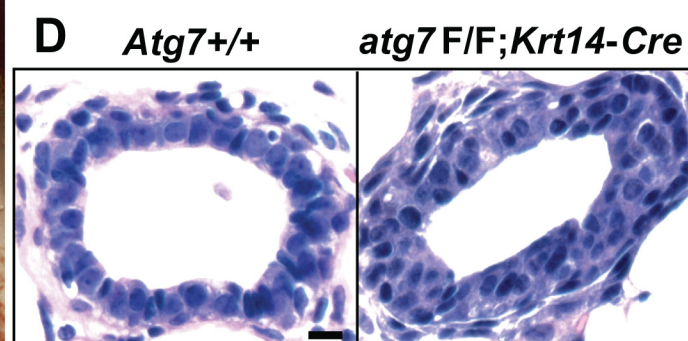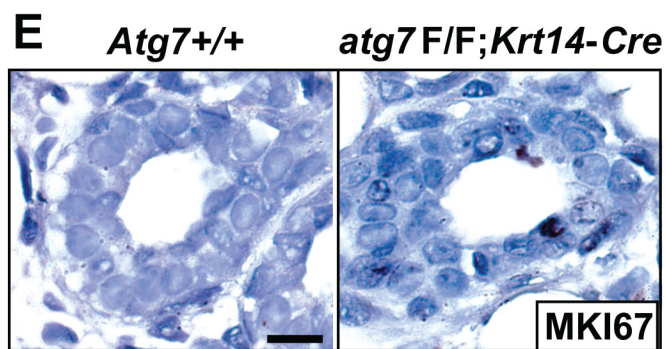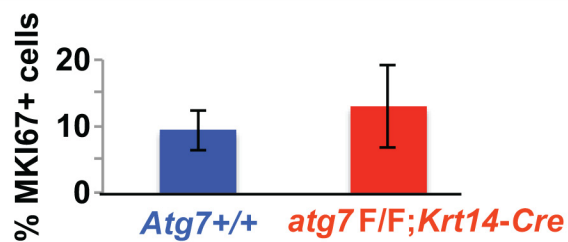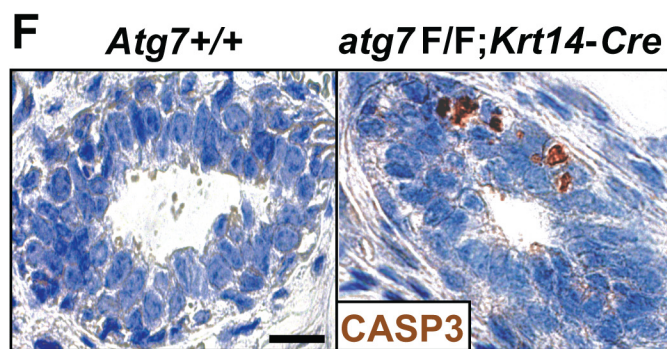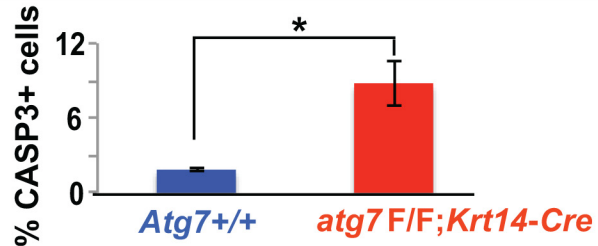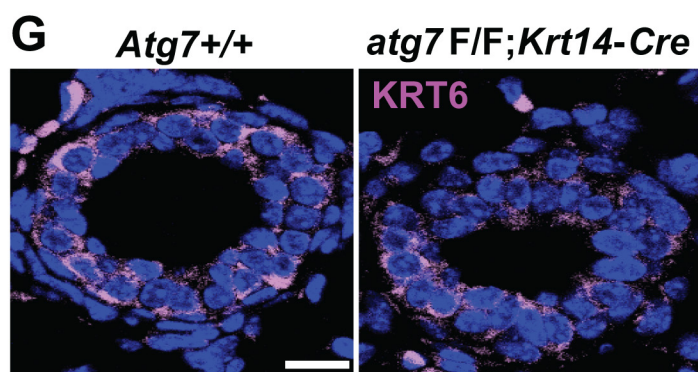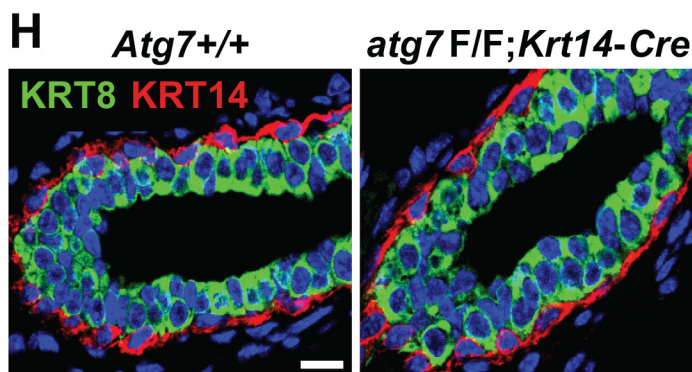

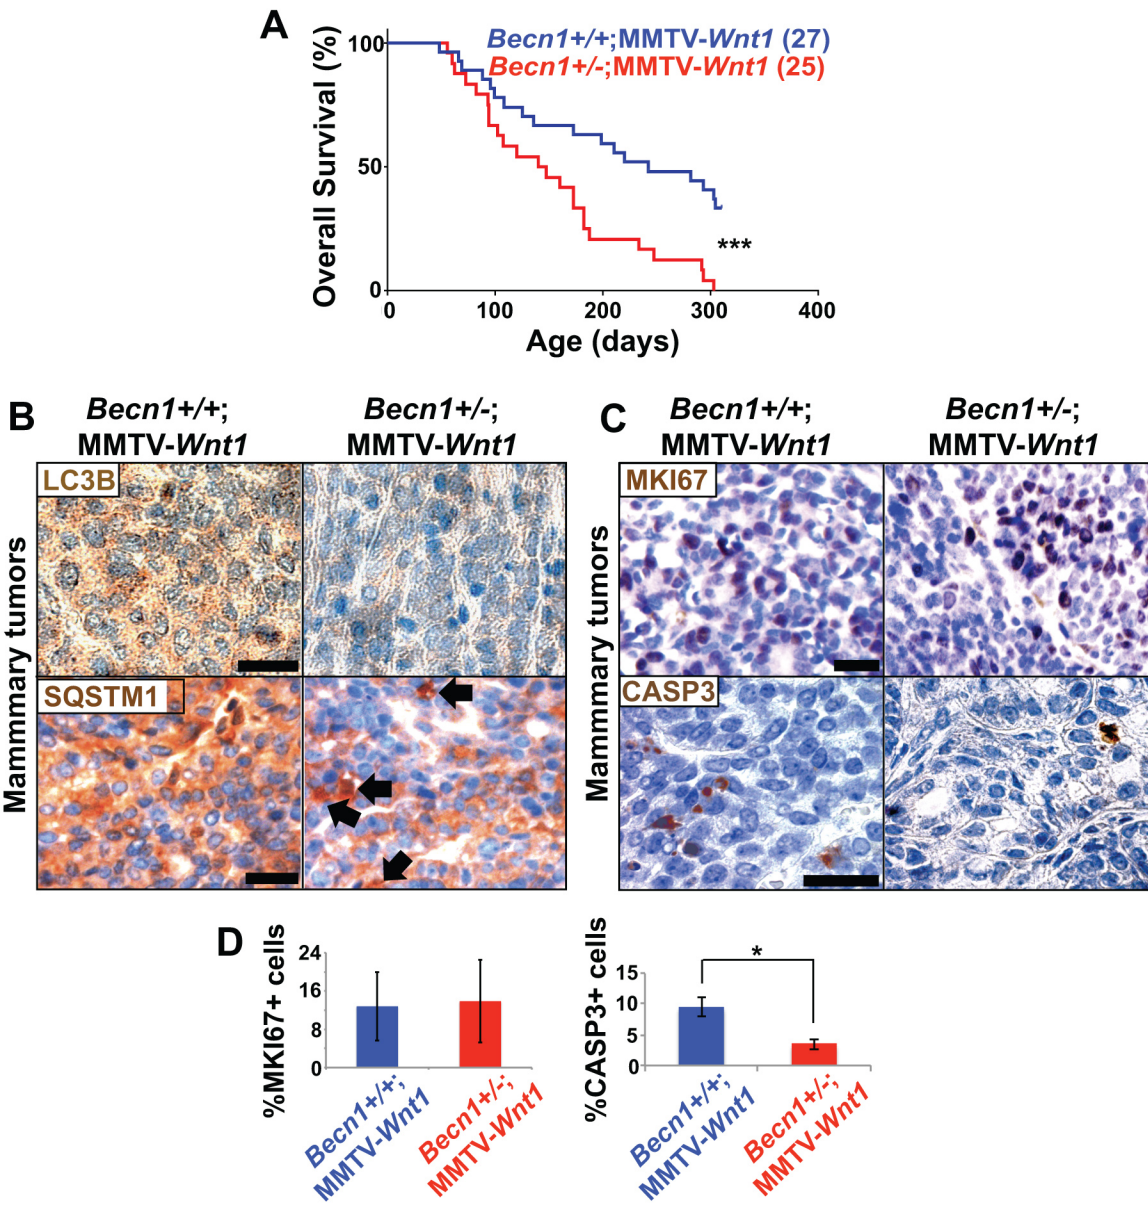

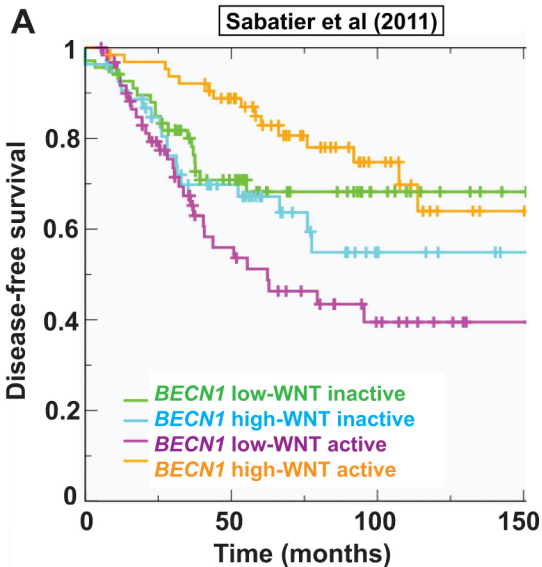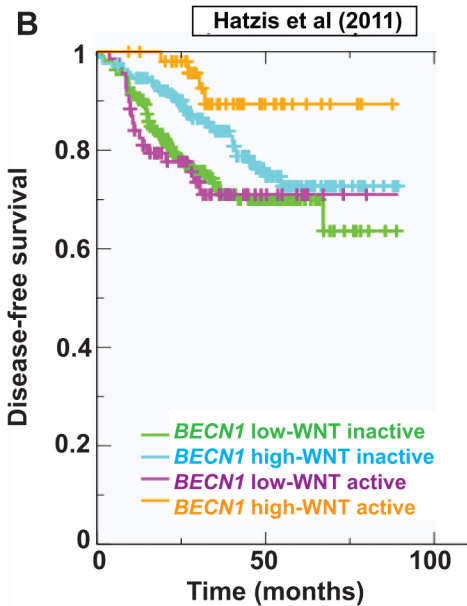

**Figure S1.** MGs of *Becn1*<sup>+/-</sup> mice display increased proliferation and defective autophagy status. **(A, C, E and F)** Immunohistochemical analysis of MGs from cohoused *Becn1*<sup>+/+</sup> (left) and *Becn1*<sup>+/-</sup> (right) 5-wk old littermates. **(A)** Representative images and **(B)** quantification of MKI67<sup>+</sup> cells in mammary ducts (left) and TEBs (right) shown as means  $\pm$  SDs (n=3 mammary gland specimens per genotype). **(C)** Representative images and **(D)** quantification of cleaved CASP3 in each sample in TEBs and ducts shown as means  $\pm$  SDs (n=3 mammary gland specimens per genotype). **(E)** Representative image of LC3B staining confirms decreased LC3B puncta in MGs from *Becn1*<sup>+/-</sup> mice. **(F)** Representative image of SQSTM1 staining confirms accumulation of SQSTM1 in MGs from *Becn1*<sup>+/-</sup> mice. \**P* <0.05 and \*\**P* <0.01 by a two-tailed Student t test. Scale bar = 30  $\mu$ m for **(A,C,E,F)**.

**Figure S2.** Outgrowths from CD24<sup>+</sup>CD29<sup>hi</sup> *Becn1*<sup>+/-</sup> MEC transplantation exhibit increased MaSC activity and retain defective autophagy status. **(A and B)** MEC sorting experiments were performed 5 independent times. **(A)** FACS was performed on freshly isolated MECs stained with PI, LIN (CD31, CD45, and LY76), CD24, and CD29. Images are representative of *Becn1*<sup>+/+</sup> (left) and *Becn1*<sup>+/-</sup> (right) MEC distribution with gating for PI<sup>-</sup>LIN<sup>-</sup> cells and based on CD24 and CD29 expression. No significant differences were seen in relative MEC subpopulations. **(B)** A representative histogram shows similar numbers of CD61<sup>+</sup> cells between *Becn1*<sup>+/+</sup> and *Becn1*<sup>+/-</sup> CD24<sup>+</sup>CD29<sup>hi</sup> MEC populations. **(C and D)** Circles represent fat pads and the black color represents the percentage of the



mammary fat pad that is filled in. **(C)** Increased repopulation frequency and mammary fat pad filling are seen following transplantation of 500 CD24<sup>+</sup>CD29<sup>hi</sup> MECs isolated from 8 wk old *Becn1*<sup>+/-</sup> mice, contralateral CD24<sup>+</sup>CD29<sup>hi</sup> *Becn1*<sup>+/+</sup> and *Becn1*<sup>+/-</sup> MEC transplantations were performed. **(D)** Increased repopulation frequency and mammary fat pad filling are seen following transplantation of 500 CD24<sup>+</sup>CD29<sup>hi</sup> MECs isolated from 9.5-wk old *Becn1*<sup>+/-</sup> mice, contralateral CD24<sup>+</sup>CD29<sup>hi</sup> *Becn1*<sup>+/+</sup> and *Becn1*<sup>+/-</sup> MEC transplantations were performed. **(E)** Representative image of LC3B staining in samples confirms decreased LC3B puncta in outgrowths from CD24<sup>+</sup>CD29<sup>hi</sup> *Becn1*<sup>+/-</sup> MEC transplantation. **(F)** Representative image of SQSTM1 staining confirms accumulation of SQSTM1 in outgrowths from CD24<sup>+</sup>CD29<sup>hi</sup> *Becn1*<sup>+/-</sup> MEC transplantation. Scale bar= 30  $\mu$ m for **(E,F)**.

**Figure S3.** FACS for CD24 and CD29 expression defines MEC populations with different autophagy levels. PILLIN<sup>-</sup> MECs were isolated by FACS based on CD24 and CD29 expression, and examined by EM.  $\blacktriangle$  and \* denote mitochondria and autophagosomes, respectively.

**Figure S4.** *Krt14*-driven conditional biallelic *Atg7* deletion confers autophagy deficiency in the mammary gland. **(A to H)** Evaluation of MGs from *Atg7*<sup>+/+</sup> (left) and *atg7*<sup>F/F</sup>; *Krt14-Cre* (right) mice. **(A)** Representative images of ATG7 staining confirms *Atg7* deletion in MGs from *atg7*<sup>F/F</sup>; *Krt14-Cre* mice. **(B)** Representative images of SQSTM1 (top) and LC3B (bottom) staining. **(C)** Representative MG

whole mounts (WM) from 6.5-wk old mice reveal decreased mammary fat pad filling in MGs from *atg7<sup>F/F</sup>;Krt14-Cre* mice. **(D)** Representative images of hematoxylin and eosin (H&E) staining reveal similar ductal organization in MGs from *atg7<sup>F/F</sup>;Krt14-Cre* and *Atg7<sup>+/+</sup>* mice. **(E)** Representative images and quantification of MKI67 staining. **(F)** Representative images and quantification of cleaved CASP3 staining. Representative images of **(G)** KRT6 (purple), and **(H)** KRT8 (green) and KRT14 (red) staining. Scale bar = 20  $\mu$ m for **(A,B,D to H)** and 5 mm for **(C)**.

**Figure S5.** Mammary tumors arising in *Becn1<sup>+/-</sup>;MMTV-Wnt1* mice exhibit autophagy-deficient status and decreased apoptosis. **(A)** Kaplan-Meier curves for overall survival in *Becn1<sup>+/+</sup>;MMTV-Wnt1* (n=27) and *Becn1<sup>+/-</sup>;MMTV-Wnt1* (n=25) mice demonstrates decreased overall survival in *Becn1<sup>+/-</sup>;MMTV-Wnt1* mice. **(B and C)** Analysis of mammary tumors arising in *Becn1<sup>+/+</sup>;MMTV-Wnt1* (left) and *Becn1<sup>+/-</sup>;MMTV-Wnt1* (right) mice. **(B)** Representative image of LC3B staining (top) and SQSTM1 aggregates annotated with arrow (bottom) in tumors from *Becn1<sup>+/-</sup>;MMTV-Wnt1* mice. **(C)** Representative image from MKI67 staining (top) and cleaved CASP3 staining (bottom). **(D)** Quantification of MKI67<sup>+</sup> cells (left) and cleaved CASP3<sup>+</sup> cells (right) determine proliferation and apoptosis rates, respectively, in tumors. Results are presented as means  $\pm$  SDs (n=3 mammary tumors per genotype) \**P* < 0.05 determined by a two-tailed Student t test. Scale bar= 40  $\mu$ m for **(B,C)**.

**Figure S6.** Kaplan-Meier curves for breast tumors stratified for *BECN1* expression and WNT pathway activation. **(A)** Disease-free survival for patients with breast cancers annotated in the Sabatier cohort. **(B)** Disease-free survival for patients with ERBB2-negative breast cancers annotated in the Hatzis cohort.
